# Supplementary material for: Dual-mode regulation of the APC/C by CDK1 and MAPK controls meiosis I progression and fidelity
Source: PubMed Central journal article supplement — J Cell Biol. 2014 Mar 17;204(6):891–900. doi: 10.1083/jcb.201305049 (PMC3998794; doi:10.1083/jcb.201305049), 2014-03-17
Supplement: supp_jcb.201305049_JCB_201305049_sm.pdf [file supp_jcb.201305049_JCB_201305049_sm.pdf]

Nabti et al., <http://www.jcb.org/cgi/content/full/jcb.201305049/DC1>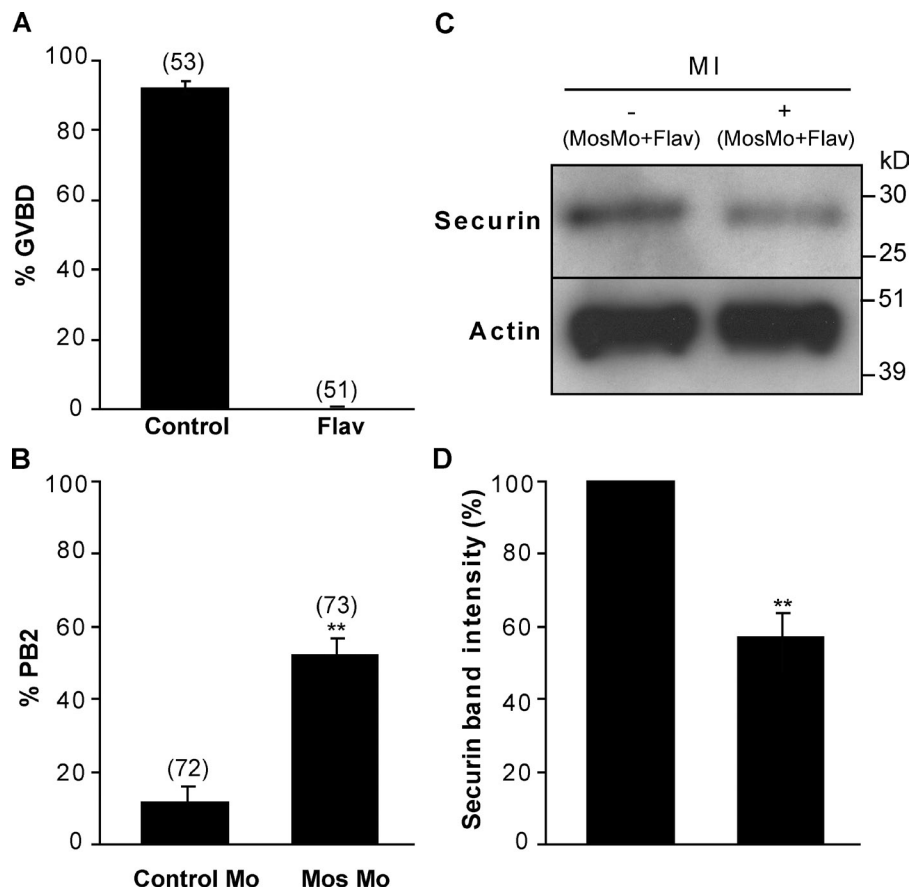

Figure S1. **Inhibition of Cdk1 and MAPK using flavopiridol and Mos morpholino also induces premature destruction of securin during prometaphase I.** (A) Rates of GVBD in control nontreated oocytes and flavopiridol (Flav)-treated oocytes. The results are from two independent experiments and represented as means and SEM. (B) Rates of PB2 in control morpholino (control Mo)- and Mos morpholino (Mos Mo)-injected oocytes. The Mos morpholino (5'-CACAG-GCTTAGAGGCGAA GGCATT-3'; Gene Tools LLC) was used at a micropipette concentration of 3 mM and microinjected in GV oocytes, which were then kept arrested for 8 h. Oocytes were scored for PB2 at 20 h after release from IBMX. (C and D) Western blot (20/lane; C) and analysis of securin (D) in oocytes at meiosis I (MI) in the absence or presence of Mos morpholino and flavopiridol. The morpholino was injected in oocytes as in B, and 5  $\mu$ M flavopiridol (Enzo Life Sciences) was applied between 3 and 5 h after release from IBMX. In B and D, data are from three independent experiments and expressed as SEMs. \*\*,  $P < 0.01$ .
